# Supplementary material for: Fast and Ultrasensitive Detection of Monkeypox by a Pyrococcus furiosus Argonaute System Coupled with a Short Amplification
Source: MDPI journal article supplement (doi:10.3390/v16030382), 2024-02-29
Supplement: s1 [file s1]

## Supplementary Materials

**Table S1.** The sequences used in this study

| Name                       | Sequence (5'-3')                                                                    |
|----------------------------|-------------------------------------------------------------------------------------|
| gDNA1                      | TTATAGCATCAGCATC                                                                    |
| gDNA2                      | CATCAGCATCAGAATC                                                                    |
| gDNA3                      | CATCAGAATCTGTAGG                                                                    |
| gDNA4                      | AATCTGTAGGCCGTGT                                                                    |
| gDNA5                      | TAGGCCGTGTATCAGC                                                                    |
| gDNA6                      | GTGTATCAGCATCCAT                                                                    |
| gDNA7                      | CAGCATCCATTGTCGT                                                                    |
| gDNA8                      | CCATTGTCGTAGACCA                                                                    |
| gDNA9                      | TCGTAGACCAACGAGG                                                                    |
| gDNA10                     | ACCAACGAGGAGGAGT                                                                    |
| F3L-forward                | CATCTATTATAGCATCAGCATCAGA                                                           |
| F3L-reverse                | GATACTCCTCCTCGTTGGTCTAC                                                             |
| F3L-reporter/ <b>probe</b> | TGTAGGCCGTGTATCAGCATCCATT                                                           |
| 79 bp amplicon             | CATCTATTATAGCATCAGCATCAGAATCTGTAGGCCGTGTATCAGCA<br>TCCATTGTCGTAGACCAACGAGGAGGAGTATC |
| ssDNA1                     | GATGCTGATACACGGCCTACAGATTCTGATGCTGATGCTATAATAG<br>ATGATGTAT                         |
| ssDNA2                     | CCGACGATACTCCTCCTCGTTGGTCTACGACAATGGATGCTGATAC<br>ACGGCCT                           |

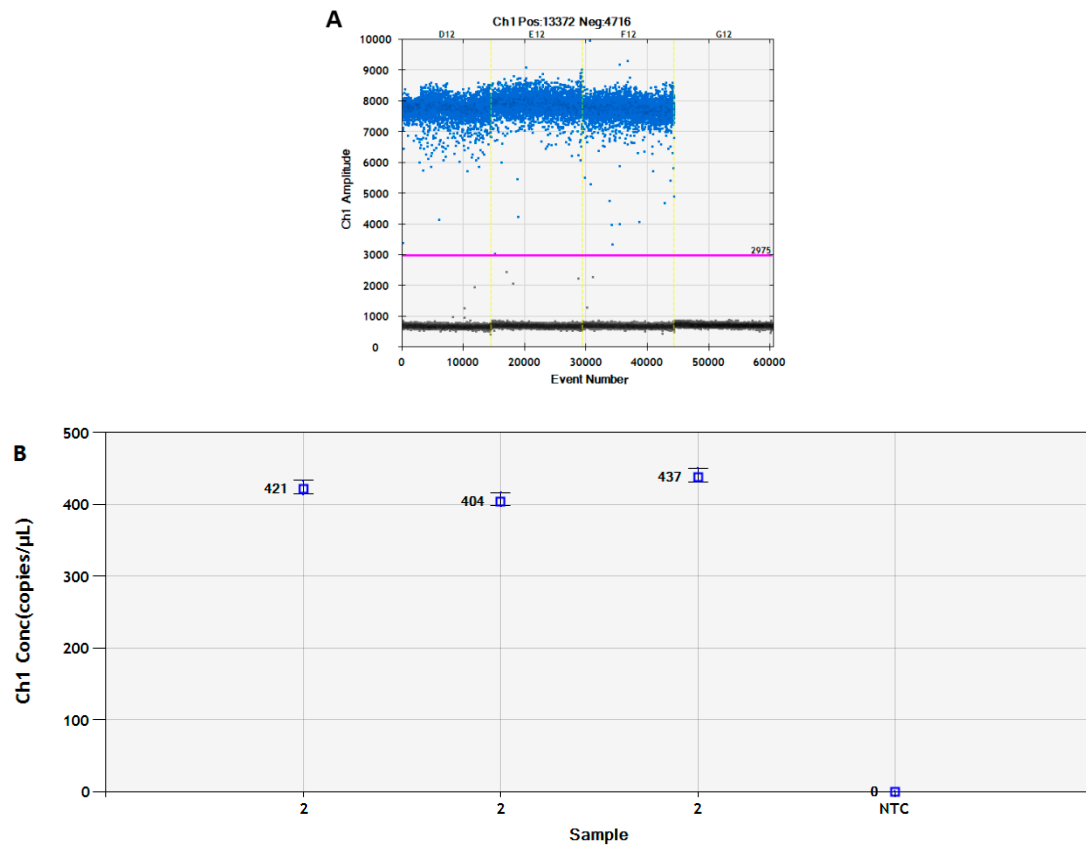

**Figure S1.** The copy number of the extracted DNA was decided by ddPCR. (A) Scattering dots of the ddPCR results. (B) The copy concentration in the 20 µL ddPCR reaction mixture. D12, E12, and F12 were triplicate. G12 was the negative control. The DNA was extracted from the sample 100-fold diluted from inactivated MPXV. By analyzing the results of ddPCR, the concentration of viral gene copies is determined to be 400,000 copies/mL.
